**Title:** PROPOFOL EFFECTS ON EEG AND RELATIONSHIP WITH PLASMA CONCENTRATION DURING NEUROSURGERY

**Authors:** P. Bendriss, M.D.<sup>\*,†</sup>, H.P. Stoiber, M.D.<sup>†</sup>, A.C. Bendriss-Brusset, M.D.<sup>†</sup>, P. Dabadie, M.D.<sup>†</sup>, P. Erny, M.D.<sup>†</sup>

**Affiliation:** Depts. of Anesth., Univ. of Texas Medical School, Houston, Texas;<sup>\*</sup> Hospital Tripode, Bordeaux, France<sup>†</sup> 33077

The goal of this study was to assess the relationship between propofol plasma concentration (PPC), EEG activity and cardiovascular (CV) effects<sup>1</sup> during neurosurgery.

The protocol was approved by the ethics committee and informed written consent was obtained from 7 nonpremedicated patients (48.5±6.6 year, weighing 64.9±1.9 kg) with normal preoperative EEG, undergoing brain biopsies. EEG was recorded continuously from 4 electrodes (2 frontals, 2 occipitals). Anesthesia was induced with propofol 2 mg/kg i.v.; dextromoramide 0.05 mg/kg i.v.; vecuronium 0.01 mg/kg i.v. After intubation, anesthesia was maintained with propofol 6 mg/kg/h. The rate of infusion was increased by increments of 2 mg/kg/h until burst suppression was obtained (EEG stage I, maximum dose 14 mg/kg/h). According to the EEG changes, blood samples for PPC were collected during stages I to III. In addition, ECG (lead II), blood pressure and ETCO<sub>2</sub> were monitored prior to and

during surgery.

Duration of anesthesia was 113±11.5 min, propofol dose was 8.93±1.03 mg/kg/h. Results are presented in Tables 1 and 2. Burst suppression required PPC of 5.02 mcg/ml.

Our data indicate that there is a positive relationship between PPC and EEG activity and that CV changes are minimal during propofol anesthesia. These results suggest that propofol may be a useful anesthetic during neurosurgery.

#### References

1. Anesth Analg 68:177-181, 1989.

Table 1. EEG Description of the Different Stages

| Stage | Description                                                                                 |
|-------|---------------------------------------------------------------------------------------------|
| I     | Burst suppression: 10-12 Hz or 1-4 Hz, low amplitude and electrical silence during 4-6 sec. |
| II    | Periodic activity: 10-12 Hz, low amplitude and 1-4 Hz low amplitude.                        |
| III   | 1-4 Hz moderate amplitude achieved with 12-15 Hz low amplitude.                             |

Table 2. Data Function of EEG Stage

| EEG       | PPC<br>µg/ml | HR<br>bts/min | MAP<br>mmHg | RATE<br>mg/kg/min |
|-----------|--------------|---------------|-------------|-------------------|
| AWAKE     | 0            | 82±6          | 113±6       | 0                 |
| Stage I   | 5.09±0.64    | 69±3          | 92±3*       | 10.7±1.1          |
| Stage II  | 3.86±0.77    | 68±4          | 93±5*       | 2.7±1.2           |
| Stage III | 1.60±3.0     | 76±4          | 109±5       | 0                 |

Mean ± SEM; ANOVA one way; \* P < 0.05 vs control

**TITLE:** CEREBRAL BLOOD FLOW REACTIVITY TO CO<sub>2</sub> DURING HALOTHANE OR ISOFLURANE ANESTHESIA FOR CAROTID ENDARTERECTOMY

**AUTHORS:** W.L. Young, M.D., I. Prohovnik, Ph.D., J.W. Correll, M.D., N. Ostapovich, R.EEGT., E. Ornstein, Ph.D., M.D., D.O. Quest, M.D.

**AFFILIATION:** Dept. of Anes., Pyschiatry and Neurological Surgery, College of Physicians & Surgeons, Columbia University, New York, NY 10032

Decreasing PaCO<sub>2</sub> during temporary vascular occlusion may have a beneficial influence on redistribution of CBF to ischemic brain.<sup>1</sup> This study compared the effects of isoflurane (ISO) and halothane (HAL) on cerebral blood flow (CBF) reactivity to changes in PaCO<sub>2</sub> during carotid endarterectomy.

**METHODS.** After obtaining institutional approval and informed consent, 14 patients, mean (± SE) age 68 ± 2 received either ISO (n = 12), 0.75% or O<sub>2</sub>/N<sub>2</sub>O, 1:1 or HAL (n = 7), 0.5% in O<sub>2</sub>/N<sub>2</sub>O, 1:1. Measurements were made during the period of temporary bypass shunting. Global CBF was measured using i.v. 133-Xe.<sup>2</sup> After a baseline CBF measurement, the PaCO<sub>2</sub> was elevated 8-10 mmHg by addition of CO<sub>2</sub> to the inspired gas mixture and CBF was again measured. Data are expressed as mean ± SEM.

**RESULTS.** By ANOVA, there was a significant effect of PaCO<sub>2</sub> to increase CBF but no difference between anesthetics, as shown in Fig. 1. There were no significant differences in mean blood pressure, temperature or heart rate between groups during the 2 measurements. No cerebral ischemia was detected by EEG. There was no difference (P = 0.913) in mean CBF reactivity to

changes in PaCO<sub>2</sub> (ml/100g/min/mmHg) between ISO (1.7 ± 0.5) and HAL (1.8 ± 0.4). These values correspond to a relative 4 and 5 % change in CBF per mmHg, respectively. The extrapolated CBF (ml/100g/min) at PaCO<sub>2</sub> = 40 mmHg tended (P = 0.126) to be higher for HAL (41 ± 4) than ISO (32 ± 3).

**DISCUSSION.** ISO increases the slope of feline CBF responsiveness to changes in PaCO<sub>2</sub> in the hypocapnic range relative to HAL.<sup>3</sup> In elderly patients undergoing carotid endarterectomy with relatively low maintenance concentrations of HAL or ISO in N<sub>2</sub>O there was no significant difference in their effects on CO<sub>2</sub> reactivity in mildly hypo- to normocapnic ranges.

#### REFERENCES

1. Anesthesiology 70:288-292, 1989
2. Anesthesiology 71:863-869, 1989
3. Anesthesiology 65:462-467, 1986

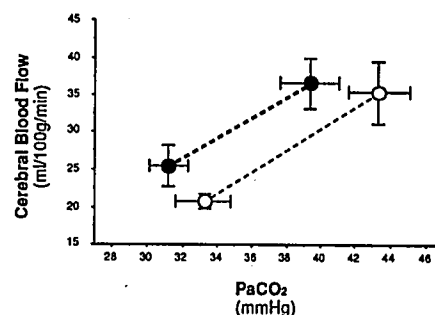

Table 1. Mean CBF as a function of PaCO<sub>2</sub> for ISO (open circles) and HAL (closed circles).
